# Supplementary material
Source: HighWire-hosted journal article supplement (https://erj.ersjournals.com/content/49/6/1602098)
Supplement: inline-supplementary-material-2 [file inline-supplementary-material-2.pdf]

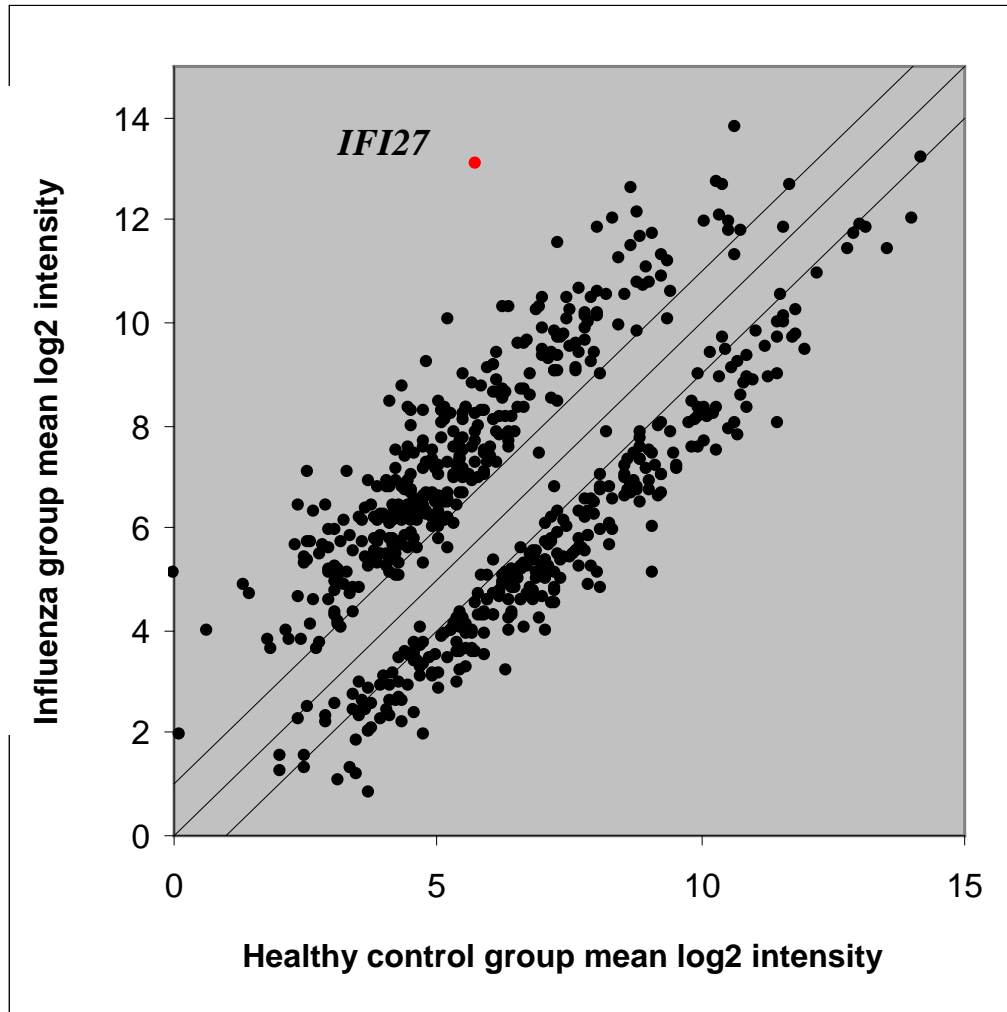

**Supplementary Figure S1**

**Gene-expression analysis using a different microarray platform.** PAXgene whole blood samples were obtained from individuals with confirmed influenza infection (influenza A H1N1) and from healthy controls. RNA was extracted for microarray analysis on Illumina Sentrix HT-12\_v3\_BeadChip arrays. Individual data points denote genes that were statistically differentially expressed between influenza patients and healthy controls. Y-axis represents the mean  $\log_2$  of expression intensity of the influenza patient group. X-axis represents the mean  $\log_2$  of expression intensity of the healthy control group. Diagonal line represents no change in expression when two groups were compared (influenza vs. healthy controls). Line above or below the diagonal line represents the cut-off for 2 fold difference in the mean expression levels between the two groups. *IFI27* is highlighted in red colour. Complete microarray data is available in Gene Expression Omnibus (GSE40012).
