# Supplementary material
Source: HighWire-hosted journal article supplement (https://erj.ersjournals.com/content/49/6/1602098)
Supplement: inline-supplementary-material-3 [file inline-supplementary-material-3.pdf]

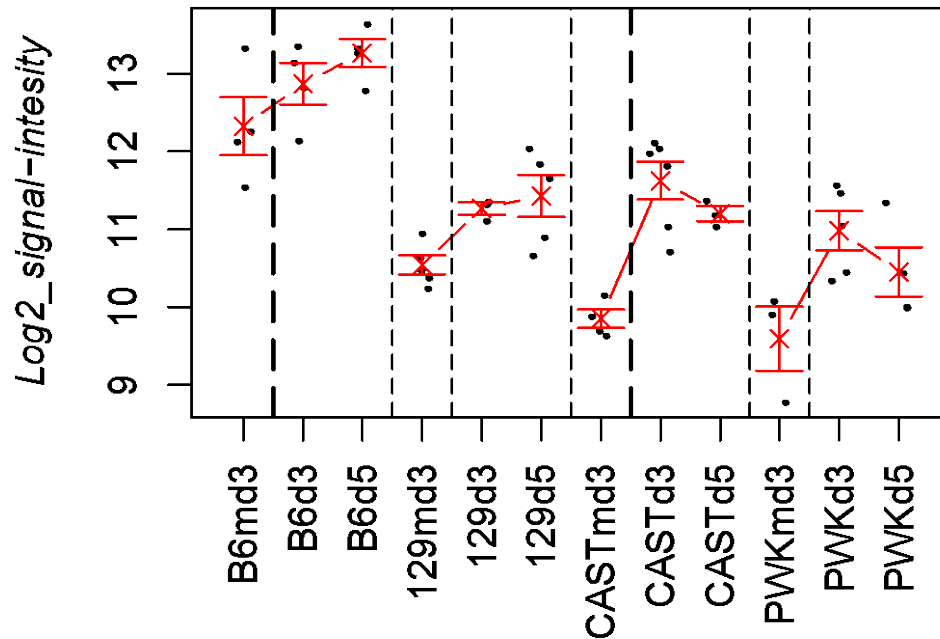

**Supplementary Figure S2**

***ifi27* gene expression in mouse influenza infection model.** Eight to twelve weeks old female mice from four Collaborative Cross founder strains were infected intranasally with 10 FFU of the mouse-adapted influenza H3N2 virus (A/HK/01/68). Whole blood samples were analyzed for gene expression changes from mock-treated mice and at days 3 and 5 post infection (GSE74077). On the y-axis, *Ifi27* gene-expression levels are presented as normalized Log2-signal intensities. On the x-axis, mouse strains are presented as follows - B6: C57BL/6J, 129: 129S1/SvImJ, CAST: CAST/EiJ, PWK: PWK/PhJ mouse strains; md3: mock-infected mice at day 3 post treatment; d3, d5: infected mice at day 3 and 5 post infection, respectively. These findings show that *Ifi27* was upregulated in all four strains of different severity: mild (PWK/PhJ, all infected mice survived), intermediate (C57BL/6J, 129S1/SvImJ, 50% of infected mice survived) and severe (CAST/EiJ, all infected mice died). Therefore, these findings confirmed that *Ifi27* was an influenza biomarker in mild, moderate and severe infection.
