# Supplementary material
Source: HighWire-hosted journal article supplement (https://erj.ersjournals.com/content/49/6/1602098)
Supplement: inline-supplementary-material-4 [file inline-supplementary-material-4.pdf]

## Supplementary Table S1

### Discovery cohorts – influenza positive patients

|                            | Australian Cohort<br>(n=8) | Canadian Cohort<br>(n=33) | German Cohort<br>(n=24) |
|----------------------------|----------------------------|---------------------------|-------------------------|
| <i>IFI27</i> fold change * | 967                        | 304                       | 269                     |
| Mean (SD)                  | (793)                      | (108)                     | (143)                   |
| <b>Patient Outcomes</b>    |                            |                           |                         |
| ICU admission              | 8 (100%)                   | 33 (100%)                 | 5 (21%)                 |
| Mechanical ventilation     | 8 (100%)                   | 30 (91%)                  | 4 (17%)                 |
| <b>Comorbidity</b>         |                            |                           |                         |
| COPD                       | 2 (25%)                    | 5 (36%)                   | 2 (8%)                  |
| Heart disease              | 0                          | 2 (6%)                    | 2 (8%)                  |
| Diabetes                   | 1 (12.5%)                  | 6 (18%)                   | 0                       |
| Hypertension               | 1 (12.5%)                  | 12 (36%)                  | 2 (8%)                  |
| Cancer                     | 0                          | 0                         | 2 (8%)                  |

\* *IFI27* gene-expression was measured by quantitative real-time PCR. Gene-expression data is presented as mean fold change (relative to healthy controls) with standard deviations in parenthesis.

COPD denotes chronic obstructive pulmonary disease.
