# Supplementary material
Source: HighWire-hosted journal article supplement (https://erj.ersjournals.com/content/49/6/1602098)
Supplement: inline-supplementary-material-5 [file inline-supplementary-material-5.pdf]

## Supplementary Table S2

### Prospective validation cohort - patient characteristics

|                                                               | Number        |
|---------------------------------------------------------------|---------------|
| Gender (males/females)                                        | 182/220       |
| Mean age (standard deviation)                                 | 53 years (19) |
| Duration of onset                                             | 5.9 days      |
| <b>Frequency of flu symptoms*</b>                             |               |
| - cough                                                       | 309 (77%)     |
| - dyspnea                                                     | 218 (54%)     |
| - nasal symptoms                                              | 177 (44%)     |
| - sore throat                                                 | 183 (46%)     |
| - malaise/aches                                               | 193 (48%)     |
| - fever/chills                                                | 268 (67%)     |
| <b>Patients with comorbidity*</b>                             |               |
| - asthma                                                      | 70 (17%)      |
| - chronic airway disease                                      | 87 (22%)      |
| - ischemic heart disease                                      | 107 (27%)     |
| - obesity                                                     | 11 (3%)       |
| - diabetes                                                    | 46 (11%)      |
| - cancer/on chemotherapy                                      | 51 (13%)      |
| - cerebral vascular diseases                                  | 20 (5%)       |
| <b>Clinical setting</b>                                       |               |
| - outpatient                                                  | 27 (7%)       |
| - emergency departments                                       | 359 (89%)     |
| - intensive care unit                                         | 15 (4%)       |
| <b>Infection type</b>                                         |               |
| - viral infection                                             | 162 (40%)     |
| - bacterial infection                                         | 48 (12%)      |
| - co-infection (viral & bacterial)                            | 13 (3%)       |
| - non-infectious cases                                        | 177 (44%)     |
| <b>Outcomes</b>                                               |               |
| - admission to hospitals                                      | 248 (62%)     |
| - length of hospital stay (excluding intensive care patients) | 4.7 days      |
| - length of stay in intensive care unit (n=15)                | 33 days       |
| - death                                                       | 7 (1.7%)      |

\* Many patients have more than one symptoms/comorbidities.

Means values are given for duration since onset and length of stay.

Data are presented as numbers followed by percentage included in parenthesis unless specified. Percentage is calculated with a total of 402 patients. Healthy controls (n=37) are not included in the calculation.
