# Supplementary material
Source: HighWire-hosted journal article supplement (https://erj.ersjournals.com/content/49/6/1602098)
Supplement: inline-supplementary-material-6 [file inline-supplementary-material-6.pdf]

### Supplementary Table S3

#### Prospective validation cohort – pathogens identified

|                             | Number |
|-----------------------------|--------|
| Influenza A virus           | 71     |
| Influenza B virus           | 25     |
| Respiratory syncytial virus | 13     |
| Rhinovirus                  | 39     |
| Human metapneumovirus       | 11     |
| Parainfluenza virus         | 6      |
| Adenovirus                  | 1      |
| Haemophilus influenzae      | 13     |
| Streptococcus species       | 8      |
| Staphylococcus aureus       | 6      |
| Mycoplasma                  | 5      |
| Gram-negative species*      | 19     |

Data are presented as number of patients unless indicated otherwise.

\* Gram-negative species include Legionella, Moraxella, Serratia, Klebsiella, Stenotrophomonas, E coli and Providencia.
